# Supplementary material
Source: publisher figshare collection journal article supplement (https://sage.figshare.com/ndownloader/files/36009527)
Supplement: Supplementary file 1 [file 36009527]

| **Sex: Male** | | **Total Instances Observed** | | | **Incidence Range** | | |
| --- | --- | --- | --- | --- | --- | --- | --- |
| **Tissue** | **Observation** | **Cambodian** | **Chinese** | **Vietnamese** | **Cambodian** | **Chinese** | **Vietnamese** |
| Adrenal Glands | Small | - | 1 (0.13%), N=756 | - | - | [0-16.67%] | - |
| Bone Marrow | Irregular Surface | - | 1 (0.14%), N=705 | - | - | [0-20.00%] | - |
| Brain | Cyst | - | 1 (0.13%), N=756 | - | - | [0-11.11%] | - |
| Dilation | 1 (0.35%), N=282 | - | - | [0-16.67%] | - | - |
| Discoloration, Yellow | 1 (0.35%), N=282 | - | - | [0-20.00%] | - | - |
| Epididymides | Focus/Foci, Red | 1 (0.35%), N=282 | - | - | [0-20.00%] | - | - |
| Focus/Foci, Tan | - | 1 (0.13%), N=756 | - | - | [0-20.00%] | - |
| Nodule | - | - | 1 (0.82%), N=122 | - | - | [0-16.67%] |
| Heart | Irregular Surface | - | - | 1 (0.82%), N=122 | - | - | [0-20.00%] |
| Kidneys | Cyst | - | 1 (0.13%), N=756 | - | - | [0-20.00%] | - |
| Dilation, Pelvic | - | 2 (0.26%), N=756 | - | - | [0-33.33%] | - |
| Discoloration, Tan | 1 (0.35%), N=282 | 1 (0.13%), N=756 | - | [0-16.67%] | [0-33.33%] | - |
| Focus/Foci, Red | 1 (0.35%), N=282 | - | - | [0-20.00%] | - | - |
| Irregular Surface | - | 1 (0.13%), N=756 | - | - | [0-20.00%] | - |
| Large Intestine, Cecum | Enlarged | - | 1 (0.13%), N=756 | - | - | [0-16.67%] | - |
| Focus/Foci, Red | - | 1 (0.13%), N=756 | 1 (0.82%), N=122 | - | [0-25.00%] | [0-20.00%] |
| Parasite Present | 1 (0.35%), N=282 | 1 (0.13%), N=756 | - | [0-25.00%] | [0-10.00%] | - |
| Large Intestine, Colon | Discoloration, Red | - | - | 1 (0.82%), N=122 | - | - | [0-16.67%] |
| Enlarged | - | 1 (0.13%), N=756 | - | - | [0-16.67%] | - |
| Parasite Present | - | 1 (0.13%), N=756 | - | - | [0-10.00%] | - |
| Large Intestine, Rectum | Focus/Foci, Red | 1 (0.36%), N=278 | - | - | [0-20.00%] | - | - |
| Liver | Cyst | - | 1 (0.15%), N=685 | - | - | [0-20.00%] | - |
| Discoloration, Tan | - | 1 (0.15%), N=685 | - | - | [0-25.00%] | - |
| Focus/Foci, Tan | - | 2 (0.29%), N=685 | - | - | [0-16.67%] | - |
| Focus/Foci, White | - | 1 (0.15%), N=685 | - | - | [0-16.67%] | - |
| Irregular Surface | - | 1 (0.15%), N=685 | - | - | [0-16.67%] | - |
| Lung | Adhesion | 1 (0.35%), N=282 | 1 (0.13%), N=756 | - | [0-16.67%] | [0-25.00%] | - |
| Discoloration, Red | 1 (0.35%), N=282 | - | - | [0-20.00%] | - | - |
| Focus/Foci, Brown | 1 (0.35%), N=282 | - | - | [0-20.00%] | - | - |
| Focus/Foci, Red | - | 2 (0.26%), N=756 | - | - | [0-14.29%] | - |
| Foreign Material | 1 (0.35%), N=282 | - | - | [0-16.67%] | - | - |
| Nodule | - | 1 (0.13%), N=756 | - | - | [0-20.00%] | - |
| Lymph Node, Mesenteric | Enlarged | - | 1 (0.13%), N=756 | - | - | [0-16.67%] | - |
| Pituitary Gland | Small | 1 (0.35%), N=282 | 1 (0.13%), N=756 | - | [0-14.29%] | [0-20.00%] | - |
| Skin | Abrasion/Scab | 1 (0.35%), N=285 | 5 (0.66%), N=759 | - | [0-16.67%] | [0-20.00%] | - |
| Discoloration, Red | 67a*, b* (23.51%), N=285 | 88a*, c* (11.59%), N=759 | 1b*, c* (0.82%), N=122 | [0-80.00%] | [0-100.00%] | [0-20.00%] |
| Discoloration, White | 1 (0.35%), N=285 | - | - | [0-16.67%] | - | - |
| Edema | 1 (0.35%), N=285 | - | - | [0-20.00%] | - | - |
| Hair Sparse | - | 3 (0.4%), N=759 | - | - | [0-25.00%] | - |
| Nodule | 1 (0.35%), N=285 | - | - | [0-12.50%] | - | - |
| Swollen/Thickened | 1 (0.35%), N=285 | 1 (0.13%), N=759 | - | [0-20.00%] | [0-20.00%] | - |
| Small Intestine, Duodenum | Mass | 1 (0.35%), N=282 | - | - | [0-20.00%] | - | - |
| Small Intestine, Jejunum | Cyst | - | 1 (0.13%), N=756 | - | - | [0-33.33%] | - |
| Intussusception | 1 (0.35%), N=282 | - | - | [0-16.67%] | - | - |
| Spleen | Focus/Foci, Red | - | - | 1 (0.82%), N=122 | - | - | [0-20.00%] |
| Focus/Foci, Tan | 1 (0.35%), N=282 | 1 (0.13%), N=756 | - | [0-12.50%] | [0-16.67%] | - |
| Focus/Foci, White | - | 1 (0.13%), N=756 | - | - | [0-10.00%] | - |
| Irregular Surface | 1 (0.35%), N=282 | 1 (0.13%), N=756 | - | [0-20.00%] | [0-33.33%] | - |
| Stomach | Discoloration, Red | 1 (0.35%), N=285 | 2 (0.26%), N=763 | - | [0-25.00%] | [0-25.00%] | - |
| Focus/Foci, Red | - | 4 (0.52%), N=763 | - | - | [0-25.00%] | - |
| Focus/Foci, Tan | 1 (0.35%), N=285 | - | 1 (0.81%), N=124 | [0-12.50%] | - | [0-20.00%] |
| Irregular Surface | 1 (0.35%), N=285 | 2 (0.26%), N=763 | - | [0-16.67%] | [0-20.00%] | - |
| Laceration/Perforation | - | 1 (0.13%), N=763 | - | - | [0-16.67%] | - |
| Ulcer | - | - | 1 (0.81%), N=124 | - | - | [0-20.00%] |
| Testes | Discoloration, Red | - | 1 (0.13%), N=756 | - | - | [0-16.67%] | - |
| Enlarged | - | 1 (0.13%), N=756 | - | - | [0-16.67%] | - |
| Small | - | 1 (0.13%), N=756 | - | - | [0-16.67%] | - |
| Thymus | Discoloration, Red | - | 1 (0.13%), N=756 | - | - | [0-20.00%] | - |
| Enlarged | - | 1 (0.13%), N=756 | - | - | [0-11.11%] | - |
| Focus/Foci, Red | 1 (0.35%), N=282 | 2 (0.26%), N=756 | - | [0-20.00%] | [0-20.00%] | - |
| Small | 1 (0.35%), N=282 | 3 (0.4%), N=756 | - | [0-20.00%] | [0-20.00%] | - |
| Thyroid Gland | Absent | 1 (0.35%), N=287 | 2 (0.26%), N=764 | 2 (1.61%), N=124 | [0-25.00%] | [0-20.00%] | [0-20.00%] |
| Absent, Portion | - | 1 (0.13%), N=764 | - | - | [0-16.67%] | - |
| Cyst | 1 (0.35%), N=287 | 1 (0.13%), N=764 | - | [0-16.67%] | [0-20.00%] | - |
| Discoloration, Red | - | 1 (0.13%), N=764 | - | - | [0-20.00%] | - |
| Discoloration, White | - | 1 (0.13%), N=764 | - | - | [0-20.00%] | - |
| Enlarged | 2 (0.7%), N=287 | 2 (0.26%), N=764 | 1 (0.81%), N=124 | [0-20.00%] | [0-25.00%] | [0-16.67%] |
| Small | 1 (0.35%), N=287 | 1 (0.13%), N=764 | - | [0-25.00%] | [0-33.33%] | - |
| Trachea | Fluid, Clear | - | 1 (0.13%), N=756 | - | - | [0-11.11%] | - |
| Ureters | Distended with Urine | - | 2 (0.27%), N=735 | - | - | [0-33.33%] | - |

| **Sex: Female** | | **Total Instances Observed** | | | **Incidence Range** | | |
| --- | --- | --- | --- | --- | --- | --- | --- |
| **Tissue** | **Observation** | **Cambodian** | **Chinese** | **Vietnamese** | **Cambodian** | **Chinese** | **Vietnamese** |
| Adrenal Glands | Absent | - | 1 (0.13%), N=747 | - | - | [0-16.67%] | - |
| Calculus/Calculi | - | 1 (0.13%), N=747 | - | - | [0-25.00%] | - |
| Enlarged | - | 2 (0.27%), N=747 | - | - | [0-16.67%] | - |
| Focus/Foci, Tan | - | 1 (0.13%), N=747 | - | - | [0-20.00%] | - |
| Bone Marrow | Discoloration, Tan | - | - | 1 (0.83%), N=120 | - | - | [0-11.11%] |
| Irregular Surface | - | 2 (0.28%), N=705 | - | - | [0-25.00%] | - |
| Brain | Discoloration, White | - | 1 (0.13%), N=747 | - | - | [0-16.67%] | - |
| Irregular Surface | 1 (0.37%), N=271 | - | - | [0-16.67%] | - | - |
| Kidneys | Absent | - | 1 (0.13%), N=747 | - | - | [0-20.00%] | - |
| Cyst | - | 2 (0.27%), N=747 | - | - | [0-20.00%] | - |
| Discoloration, Tan | 2 (0.74%), N=271 | 3 (0.4%), N=747 | 1 (0.83%), N=120 | [0-20.00%] | [0-20.00%] | [0-20.00%] |
| Small | 1 (0.37%), N=271 | 1 (0.13%), N=747 | 1 (0.83%), N=120 | [0-20.00%] | [0-16.67%] | [0-20.00%] |
| Large Intestine, Colon | Focus/Foci, Red | - | 2 (0.27%), N=747 | - | - | [0-25.00%] | - |
| Liver | Discoloration, Tan | - | 2 (0.3%), N=674 | - | - | [0-25.00%] | - |
| Focus/Foci, Tan | - | 1 (0.15%), N=674 | - | - | [0-20.00%] | - |
| Lung | Discoloration, Brown | - | 1 (0.13%), N=747 | - | - | [0-20.00%] | - |
| Discoloration, Red | - | 1 (0.13%), N=747 | - | - | [0-20.00%] | - |
| Focus/Foci, Brown | - | 1 (0.13%), N=747 | - | - | [0-16.67%] | - |
| Focus/Foci, Tan | - | 1 (0.13%), N=747 | - | - | [0-14.29%] | - |
| Nodule | - | 1 (0.13%), N=747 | - | - | [0-20.00%] | - |
| Lymph Node, Mandibular | Enlarged | - | 1 (0.14%), N=737 | - | - | [0-33.33%] | - |
| Ovaries | Cyst | 13 (4.8%), N=271 | 27 (3.64%), N=742 | 3 (2.97%), N=101 | [0-40.00%] | [0-40.00%] | [0-16.67%] |
| Enlarged | 1 (0.37%), N=271 | 5 (0.67%), N=742 | 1 (0.99%), N=101 | [0-16.67%] | [0-50.00%] | [0-16.67%] |
| Small | 1 (0.37%), N=271 | 3 (0.4%), N=742 | - | [0-20.00%] | [0-25.00%] | - |
| Oviducts | Cyst | 2 (0.77%), N=259 | 3 (0.42%), N=721 | - | [0-20.00%] | [0-16.67%] | - |
| Pituitary Gland | - | 1 (0.13%), N=747 | - | - | [0-25.00%] | - |
| Focus/Foci, Black | 1 (0.37%), N=271 | - | - | [0-33.33%] | - | - |
| Skeletal Muscle | Swollen/Thickened | 1 (1.32%), N=76 | - | - | [0-33.33%] | - | - |
| Skin | Abrasion/Scab | 1 (0.37%), N=272 | 9 (1.2%), N=752 | - | [0-20.00%] | [0-33.33%] | - |
| Abscess | 1 (0.37%), N=272 | 1 (0.13%), N=752 | - | [0-25.00%] | [0-11.11%] | - |
| Discoloration, Red | 72 (26.47%), N=272 | 91 (12.1%), N=752 | 2 (1.67%), N=120 | [0-100.00%] | [0-100.00%] | [0-40.00%] |
| Focus/Foci, Red | - | 2 (0.27%), N=752 | - | - | [0-16.67%] | - |
| Hair Sparse | - | 8 (1.06%), N=752 | - | - | [0-33.33%] | - |
| Laceration/Perforation | - | 1 (0.13%), N=752 | - | - | [0-25.00%] | - |
| Mass | - | 1 (0.13%), N=752 | - | - | [0-25.00%] | - |
| Nodule | - | 1 (0.13%), N=752 | - | - | [0-33.33%] | - |
| Small Intestine, Ileum | Discoloration, Red | - | 1 (0.13%), N=747 | 1 (0.83%), N=120 | - | [0-20.00%] | [0-20.00%] |
| Focus/Foci, Red | - | 1 (0.13%), N=747 | - | - | [0-20.00%] | - |
| Spleen | Cyst | 1 (0.37%), N=271 | - | - | [0-20.00%] | - | - |
| Discoloration, White | - | 1 (0.13%), N=747 | - | - | [0-16.67%] | - |
| Enlarged | - | 1 (0.13%), N=747 | - | - | [0-16.67%] | - |
| Focus/Foci, Tan | 1 (0.37%), N=271 | - | - | [0-16.67%] | - | - |
| Stomach | Discoloration, Red | - | 3 (0.4%), N=750 | - | - | [0-33.33%] | - |
| Focus/Foci, Red | - | 2 (0.27%), N=750 | 1 (0.83%), N=120 | - | [0-20.00%] | [0-20.00%] |
| Focus/Foci, White | - | 1 (0.13%), N=750 | - | - | [0-16.67%] | - |
| Thymus | Small | - | 4 (0.54%), N=747 | - | - | [0-33.33%] | - |
| Thyroid Gland | Absent | - | 2 (0.26%), N=755 | 1 (0.82%), N=122 | - | [0-25.00%] | [0-20.00%] |
| Cyst | - | 2 (0.26%), N=755 | - | - | [0-20.00%] | - |
| Discoloration, Red | - | 1 (0.13%), N=755 | - | - | [0-20.00%] | - |
| Enlarged | - | 1 (0.13%), N=755 | - | - | [0-25.00%] | - |
| Focus/Foci, Red | - | 1 (0.13%), N=755 | - | - | [0-14.29%] | - |
| Small | - | 1 (0.13%), N=755 | 1 (0.82%), N=122 | - | [0-20.00%] | [0-16.67%] |
| Uterus with Cervix | Cyst | - | - | 1 (0.83%), N=120 | - | - | [0-33.33%] |
| Discoloration, Red | - | 1 (0.13%), N=747 | - | - | [0-25.00%] | - |
| Enlarged | 1 (0.37%), N=271 | 1 (0.13%), N=747 | - | [0-14.29%] | [0-25.00%] | - |
| Vagina | Prolapse | - | 1 (0.13%), N=747 | - | - | [0-25.00%] | - |
